# Supplementary material
Source: publisher figshare collection journal article supplement (https://gsajournals.figshare.com/ndownloader/files/14214227)
Supplement: Supplementary file 1 [file 14214227]

POP	M	DIST	SHIPMENTS	RECEIPTS	WHEAT_50b	RICE_50b	CENTRALITY	Env
LA	17.984215	1179.3333	0.172832	4.43142	254053.2649	740190.1715	0	17.019043
TX	9.1423525	1236.1111	10.462916	55.590223	0	745478.6836	5	16.3418431
KS	24.5378375	1036.3333	35.29876	3.314456	1909107.531	0	98	3.5950693
CA	10.63322	2067.6667	2.2154043	10.590569	231129.5767	0	0	3.2484244
AR	17.2897125	1096.7778	0.356	0.166	185328.6326	796881.8453	3	3.1212882
OK	23.17577375	1017	12.053613	2.637918	1845491.138	0	13	0.3546331
ND	16.6816675	1420.5556	47.047967	3.683122	364691.9368	0	31	29.7977164
SC	18.28787875	1707.7778	0	1.172296	0	0	0	7.2005246
WA	5.891785	2044.8889	7.381341	27.564503	1884660.389	0	0	8.2103469
